# Supplementary material for: Does Fermentation Really Increase the Phenolic Content in Cereals? A Study on Millet
Source: MDPI journal article supplement (doi:10.3390/foods9030303), 2020-03-07
Supplement: s1 [file s1]

**Table 1.** Total phenolic content in different millet varieties reported by the literature. **TBC** (Total Benzoic Content), **TCC** (Total Cinnamic Content), **AF** (ferulic acid content), **p-CA** (para coumaric acid), **TPC** (Total Phenolic Content). Data are expressed in µg/g.

| Millet varieties | TBC   | TCC    | AF    | p-CA   | TPC    | References                       |
|------------------|-------|--------|-------|--------|--------|----------------------------------|
| <i>Kodo</i>      | 343   | 3429.6 | 2209  | 802    | 3772.6 | Chandr <i>et al.</i> , 2013 [1]  |
| <i>Finger</i>    | 156.2 | 416.5  | 358.4 | 41.4   | 572.7  | Chandr <i>et al.</i> , 2013 [1]  |
| <i>Foxtail</i>   | 174.2 | 1870.5 | 856.5 | 942.7  | 2044.7 | Chandr <i>et al.</i> , 2013 [1]  |
| <i>Foxtail</i>   | 27.8  | 484.2  | 135.2 | 85.1   | 512    | Pradeep <i>et al.</i> , 2018 [2] |
| <i>Foxtail</i>   | 53    | 314.5  | 100   | 125    | 367.5  | Pradeep <i>et al.</i> , 2018 [2] |
| <i>Proso</i>     | 378.4 | 2065.2 | 444.6 | 1235.2 | 2443.6 | Chandr <i>et al.</i> , 2013 [1]  |
| <i>Little</i>    | 269.3 | 1526.6 | 355.3 | 1085.2 | 1795.9 | Chandr <i>et al.</i> , 2013 [1]  |
| <i>Little</i>    | 43.7  | 422    | 128.3 | 175    | 465.7  | Pradeep <i>et al.</i> , 2018 [2] |
| <i>Pearl</i>     | 77.2  | 947.4  | 812.3 | 91.9   | 1024.6 | Chandr <i>et al.</i> , 2013 [1]  |

## Reference

1. Chandr, A. Millet grain phenolics and their role in disease risk reduction and health promotion: A review. *J. Funct. Foods* **2013**, *5*, 570–581.
2. Pradeep, P.M.; Sreerama, Y.N. Phenolic antioxidants of foxtail and little millet cultivars and their inhibitory effects on  $\alpha$ -amylase and  $\alpha$ -glucosidase activities. *Food Chem.* **2018**, *247*, 46–55.
